# Supplementary material
Source: PubMed Central journal article supplement (PMC9013281)
Supplement: NIHMS1688736-supplement-Suppl_Table_1_Odiase.pdf [file NIHMS1688736-supplement-Suppl_Table_1_Odiase.pdf]

| Dataset   | GSM        | Run/SampleName | Condition | Included in final analysis? |
|-----------|------------|----------------|-----------|-----------------------------|
| GSE41687  | GSM1022678 | SRR596162      | EoE       | Yes                         |
| GSE41687  | GSM1022679 | SRR596163      | EoE       | No (outlier in PCA)         |
| GSE41687  | GSM1022680 | SRR596164      | EoE       | Yes                         |
| GSE41687  | GSM1022681 | SRR596165      | EoE       | Yes                         |
| GSE41687  | GSM1022682 | SRR596166      | EoE       | No (outlier in PCA)         |
| GSE41687  | GSM1022683 | SRR596167      | EoE       | Yes                         |
| GSE41687  | GSM1022690 | SRR596174      | control   | Yes                         |
| GSE41687  | GSM1022691 | SRR596175      | control   | Yes                         |
| GSE41687  | GSM1022692 | SRR596176      | control   | Yes                         |
| GSE41687  | GSM1022693 | SRR596177      | control   | Yes                         |
| GSE41687  | GSM1022694 | SRR596178      | control   | Yes                         |
| GSE41687  | GSM1022695 | SRR596179      | control   | Yes                         |
| GSE113341 | GSM3103946 | SRR7030483     | EoE       | Yes                         |
| GSE113341 | GSM3103947 | SRR7030484     | EoE       | Yes                         |
| GSE113341 | GSM3103948 | SRR7030485     | EoE       | Yes                         |
| GSE113341 | GSM3103949 | SRR7030486     | EoE       | Yes                         |
| GSE113341 | GSM3103950 | SRR7030487     | EoE       | Yes                         |
| GSE113341 | GSM3103951 | SRR7030488     | EoE       | Yes                         |
| GSE113341 | GSM3103952 | SRR7030489     | EoE       | Yes                         |
| GSE113341 | GSM3103953 | SRR7030490     | EoE       | Yes                         |
| GSE113341 | GSM3103954 | SRR7030491     | EoE       | Yes                         |
| GSE113341 | GSM3103955 | SRR7030492     | EoE       | Yes                         |
| GSE113341 | GSM3103956 | SRR7030493     | control   | Yes                         |
| GSE113341 | GSM3103957 | SRR7030494     | control   | Yes                         |
| GSE113341 | GSM3103958 | SRR7030495     | control   | Yes                         |
| GSE113341 | GSM3103959 | SRR7030496     | control   | Yes                         |
| GSE113341 | GSM3103960 | SRR7030497     | control   | Yes                         |
| GSE113341 | GSM3103961 | SRR7030498     | control   | Yes                         |
| GSE113341 | GSM3103962 | SRR7030499     | control   | Yes                         |
| GSE113341 | GSM3103963 | SRR7030500     | control   | Yes                         |
| GSE113341 | GSM3103964 | SRR7030501     | control   | Yes                         |
| GSE113341 | GSM3103965 | SRR7030502     | control   | Yes                         |
| GSE58640  | GSM1415906 | 168            | control   | Yes                         |
| GSE58640  | GSM1415912 | 333            | EoE       | Yes                         |
| GSE58640  | GSM1415913 | 334            | EoE       | Yes                         |
| GSE58640  | GSM1415914 | 424            | EoE       | Yes                         |
| GSE58640  | GSM1415907 | 461            | control   | Yes                         |
| GSE58640  | GSM1415908 | 508            | control   | Yes                         |
| GSE58640  | GSM1415915 | 513            | EoE       | Yes                         |
| GSE58640  | GSM1415909 | 520            | control   | Yes                         |
| GSE58640  | GSM1415910 | 527            | control   | Yes                         |
| GSE58640  | GSM1415916 | 594            | EoE       | Yes                         |
| GSE58640  | GSM1415911 | 609            | control   | No (outlier in PCA)         |
| GSE58640  | GSM1415917 | 692            | EoE       | Yes                         |

|          |            |         |                  |
|----------|------------|---------|------------------|
| GSE58640 | GSM1415918 | 713 EoE | Yes              |
| GSE58640 | GSM1415920 | 778 EoE | Yes              |
| GSE58640 | GSM1415921 | 803 EoE | Yes              |
| GSE58640 | GSM1415919 | 723 EoE | BAM not provided |
